# Supplementary material for: A Brain Region-Specific Predictive Gene Map for Autism Derived by Profiling a Reference Gene Set
Source: PLOS journal article supplement (doi:10.1371/journal.pone.0028431), 2011-12-09
Supplement: S12 (10.1371/journal.pone.0028431.s012) [file journal.pone.0028431.s012]

Supplementary Table S10. Previously identified ASD-linked genes matching the AutRef84 dual profile which were not included in the input dataset.

| Gene   | Relationship to ASD |
|--------|---------------------|
| ARNT2  | Association         |
| CADPS2 | Functional          |
| CCDC64 | Association         |
| CDH22  | Association         |
| CXCR3  | Rare                |
| GABRB1 | Association         |
| GABRB3 | Association         |
| GRIK2  | Association         |
| GRIN2A | Association         |
| ITGB3  | Association         |
| NPAS2  | Association         |
| NRCAM  | Association         |
| NRP2   | Association         |
| RELN   | Association         |
| ROBO1  | Functional          |
| SEMA5A | Functional          |
| SLC9A6 | Syndromic           |
| WNT2   | Association         |
